# Supplementary material for: Combining Limited Multiple Environment Trials Data with Crop Modeling to Identify Widely Adaptable Rice Varieties
Source: PLoS One. 2016 Oct 10;11(10):e0164456. doi: 10.1371/journal.pone.0164456 (PMC5056740; doi:10.1371/journal.pone.0164456)
Supplement: S1 Appendix — (DOCX) [file pone.0164456.s001.docx]

**Appendix S1. Definition of parameters in S1 Table.**

| DVRJ |  | Development rate in juvenile phase (oC.d-1) |
| --- | --- | --- |
| DVRP |  | Development rate in panicle development phase (oC.d-1) |
| DVRR |  | Development rate in reproductive phase (oC.d-1) |
| RGRLMX |  | Maximum relative growth rate of leaf area (oC.d-1) |
| RGRLMN |  | Minimum relative growth rate of leaf area (oC.d-1) |
| SHADET |  | Tolerance index to shading (unitless) |
| FSWTD |  | The upper ratio of remaining available water to total water supply capability while transpiration declines (unitless) |
| SLA1 to 7 |  | Specific leaf area at different development stages (ha leaf kg-1 leaf biomass) |
| KDF1 to 4 |  | Light extinction coefficient of rice canopy at different development stages (unitless) |
| FST1 to 6 |  | Fraction of shoot dry matter allocated to stems at different development stages (unitless) |
| FSO1 to 3 |  | Fraction of shoot dry matter allocated to storage organs at different development reproductive stages (unitless) |
| FLV1 to 6 |  | Fraction of shoot dry matter allocated to leaves at different development stages (unitless) |
| FSH1, 2 |  | Fraction of shoot dry matter allocated to shoots at different vegetative stages (unitless) |
| EFF1 to 4 |  | Initial light use efficiency at air temperature 10, 25, 40 and 60 oC (unitless) |
| DRLV1 to 4 |  | Leaf death coefficient at different reproductive stages (unitless) |
